# Supplementary material
Source: MDPI journal article supplement (https://www.mdpi.com/2076-3417/11/23/11292)
Supplement: s1 [file s1]

**Table S1.** Cornea 1.

|          | Pressure<br>(kPa) | Pentacam measurements |          |             |          |          |             |         | t (μm) |
|----------|-------------------|-----------------------|----------|-------------|----------|----------|-------------|---------|--------|
|          |                   | Rsa (mm)              | Rfa (mm) | Rma<br>(mm) | Rsp (mm) | Rfp (mm) | Rmp<br>(mm) | Rm (mm) |        |
| Increase | 1.64              | 7.20                  | 7.63     | 7.42        | 6.05     | 6.86     | 6.46        | 6.94    | 610    |
|          | 2.23              | 7.22                  | 7.64     | 7.43        | 6.05     | 6.82     | 6.44        | 6.93    | 598    |
|          | 2.74              | 7.21                  | 7.66     | 7.44        | 6.07     | 6.87     | 6.47        | 6.95    | 589    |
|          | 3.54              | 7.27                  | 7.85     | 7.56        | 6.12     | 7.03     | 6.58        | 7.07    | 577    |
|          | 4.45              | 7.45                  | 8.14     | 7.80        | 6.26     | 7.31     | 6.79        | 7.29    | 568    |
|          | 4.98              | 7.55                  | 8.29     | 7.92        | 6.35     | 7.46     | 6.91        | 7.41    | 560    |
|          | 6.02              | 7.58                  | 8.41     | 8.00        | 6.42     | 7.68     | 7.05        | 7.52    | 552    |
|          | 6.79              | 7.61                  | 8.49     | 8.05        | 6.49     | 7.80     | 7.15        | 7.60    | 546    |
|          | 7.66              | 7.63                  | 8.55     | 8.09        | 6.48     | 7.85     | 7.17        | 7.63    | 540    |
|          | 6.80              | 7.62                  | 8.54     | 8.08        | 6.47     | 7.79     | 7.13        | 7.61    | 531    |
| Decrease | 6.10              | 7.62                  | 8.52     | 8.07        | 6.51     | 7.83     | 7.17        | 7.62    | 526    |
|          | 5.33              | 7.60                  | 8.48     | 8.04        | 6.50     | 7.79     | 7.15        | 7.59    | 518    |
|          | 4.67              | 7.55                  | 8.40     | 7.98        | 6.51     | 7.76     | 7.14        | 7.56    | 511    |
|          | 3.98              | 7.47                  | 8.28     | 7.88        | 6.45     | 7.61     | 7.03        | 7.45    | 505    |
|          | 3.32              | 7.34                  | 8.10     | 7.72        | 6.36     | 7.46     | 6.91        | 7.32    | 500    |
|          | 2.64              | 7.24                  | 7.88     | 7.56        | 6.30     | 7.23     | 6.77        | 7.16    | 497    |
|          | 1.74              | 7.06                  | 7.56     | 7.31        | 6.14     | 7.03     | 6.59        | 6.95    | 489    |

Rsa- steepest radius of the anterior corneal surface; Rfa- flattest radius of the anterior corneal surface; Rma- Mean radius of the anterior corneal surface; Rsp- steepest radius of the posterior corneal surface; Rfp- flattest radius of the posterior corneal surface; Rmp- Mean radius of the posterior corneal surface; Rm- Mean corneal radius; t- Corneal thickness

**Table S2.** Cornea 2.

|          | Pressure<br>(kPa) | Pentacam measurements |          |             |          |          |             |         | t (μm) |
|----------|-------------------|-----------------------|----------|-------------|----------|----------|-------------|---------|--------|
|          |                   | Rsa (mm)              | Rfa (mm) | Rma<br>(mm) | Rsp (mm) | Rfp (mm) | Rmp<br>(mm) | Rm (mm) |        |
| Increase | 1.61              | 7.14                  | 7.37     | 7.26        | 5.84     | 6.26     | 6.05        | 6.65    | 874    |
|          | 2.64              | 7.35                  | 7.39     | 7.37        | 6.04     | 6.18     | 6.11        | 6.74    | 854    |
|          | 3.50              | 7.40                  | 7.59     | 7.50        | 6.21     | 6.28     | 6.25        | 6.87    | 840    |
|          | 4.66              | 7.60                  | 7.74     | 7.67        | 6.49     | 6.51     | 6.50        | 7.09    | 830    |
|          | 5.54              | 7.79                  | 7.80     | 7.80        | 6.53     | 6.65     | 6.59        | 7.19    | 823    |
|          | 6.70              | 7.82                  | 7.94     | 7.88        | 6.55     | 6.84     | 6.70        | 7.29    | 818    |
|          | 7.67              | 7.82                  | 8.19     | 8.01        | 6.56     | 7.16     | 6.86        | 7.43    | 812    |
|          | 6.52              | 7.76                  | 8.25     | 8.01        | 6.50     | 7.22     | 6.86        | 7.43    | 807    |
|          | 5.67              | 7.73                  | 8.27     | 8.00        | 6.45     | 7.22     | 6.84        | 7.42    | 803    |
|          | 4.99              | 7.68                  | 8.22     | 7.95        | 6.45     | 7.17     | 6.81        | 7.38    | 799    |
| Decrease | 3.63              | 7.64                  | 8.14     | 7.89        | 6.38     | 7.08     | 6.73        | 7.31    | 795    |
|          | 2.53              | 7.53                  | 8.04     | 7.79        | 6.27     | 6.94     | 6.61        | 7.20    | 792    |
|          | 1.74              | 7.35                  | 7.70     | 7.53        | 6.07     | 6.68     | 6.38        | 6.95    | 794    |

Rsa- steepest radius of the anterior corneal surface; Rfa- flattest radius of the anterior corneal surface; Rma- Mean radius of the anterior corneal surface; Rsp- steepest radius of the posterior corneal surface; Rfp- flattest radius of the posterior corneal surface; Rmp- Mean radius of the posterior corneal surface; Rm- Mean corneal radius; t- Corneal thickness

**Table 3.** Cornea 3.

|          | Pressure<br>(kPa) | Pentacam measurements |          |             |          |          |             |         | t (μm) |
|----------|-------------------|-----------------------|----------|-------------|----------|----------|-------------|---------|--------|
|          |                   | Rsa (mm)              | Rfa (mm) | Rma<br>(mm) | Rsp (mm) | Rfp (mm) | Rmp<br>(mm) | Rm (mm) |        |
| Increase | 1.61              | 7.69                  | 8.17     | 7.93        | 6.20     | 6.78     | 6.49        | 7.21    | 1000   |
|          | 2.24              | 7.62                  | 8.76     | 8.19        | 6.24     | 7.18     | 6.71        | 7.45    | 937    |
|          | 2.58              | 7.70                  | 8.92     | 8.31        | 6.32     | 7.34     | 6.83        | 7.57    | 929    |
|          | 3.03              | 7.78                  | 9.11     | 8.45        | 6.43     | 7.60     | 7.02        | 7.73    | 921    |

|      |      |      |      |      |      |      |      |     |
|------|------|------|------|------|------|------|------|-----|
| 3.71 | 7.84 | 9.30 | 8.57 | 6.52 | 7.93 | 7.23 | 7.90 | 912 |
| 4.00 | 7.84 | 9.36 | 8.60 | 6.48 | 8.04 | 7.26 | 7.93 | 904 |
| 4.76 | 7.87 | 9.39 | 8.63 | 6.50 | 8.15 | 7.33 | 7.98 | 897 |
| 4.88 | 7.85 | 9.43 | 8.64 | 6.56 | 8.15 | 7.36 | 8.00 | 890 |
| 5.60 | 7.85 | 9.46 | 8.66 | 6.56 | 8.26 | 7.41 | 8.03 | 885 |
| 6.04 | 7.84 | 9.49 | 8.67 | 6.58 | 8.33 | 7.46 | 8.06 | 878 |
| 6.65 | 7.86 | 9.49 | 8.68 | 6.56 | 8.33 | 7.45 | 8.06 | 873 |
| 7.12 | 7.86 | 9.51 | 8.69 | 6.58 | 8.38 | 7.48 | 8.08 | 868 |
| 7.53 | 7.84 | 9.54 | 8.69 | 6.61 | 8.40 | 7.51 | 8.10 | 862 |
| 8.21 | 7.84 | 9.53 | 8.69 | 6.60 | 8.44 | 7.52 | 8.10 | 856 |

Rsa- steepest radius of the anterior corneal surface; Rfa- flattest radius of the anterior corneal surface; Rma- Mean radius of the anterior corneal surface; Rsp- steepest radius of the posterior corneal surface; Rfp- flattest radius of the posterior corneal surface; Rmp- Mean radius of the posterior corneal surface; Rm- Mean corneal radius; t- Corneal thickness

**Table S4.** Cornea 4.

|          | Pressure<br>(kPa) | Pentacam measurements |          |             |          |          |             |         | t (μm) |
|----------|-------------------|-----------------------|----------|-------------|----------|----------|-------------|---------|--------|
|          |                   | Rsa (mm)              | Rfa (mm) | Rma<br>(mm) | Rsp (mm) | Rfp (mm) | Rmp<br>(mm) | Rm (mm) |        |
| Increase | 1.68              | 7.72                  | 8.43     | 8.08        | 6.31     | 7.07     | 6.69        | 7.38    | 972    |
|          | 2.16              | 7.84                  | 8.59     | 8.22        | 6.37     | 7.22     | 6.80        | 7.51    | 966    |
|          | 2.69              | 7.94                  | 8.82     | 8.38        | 6.49     | 7.44     | 6.97        | 7.67    | 955    |
|          | 3.25              | 7.98                  | 9.01     | 8.50        | 6.57     | 7.61     | 7.09        | 7.79    | 942    |
|          | 3.73              | 7.99                  | 9.15     | 8.57        | 6.65     | 7.80     | 7.23        | 7.90    | 925    |
|          | 4.18              | 7.99                  | 9.21     | 8.60        | 6.65     | 7.85     | 7.25        | 7.93    | 918    |
|          | 4.65              | 7.99                  | 9.24     | 8.62        | 6.69     | 7.91     | 7.30        | 7.96    | 908    |
|          | 5.00              | 7.99                  | 9.26     | 8.63        | 6.72     | 7.94     | 7.33        | 7.98    | 900    |
|          | 5.68              | 7.99                  | 9.27     | 8.63        | 6.71     | 7.95     | 7.33        | 7.98    | 892    |
|          | 6.09              | 7.99                  | 9.28     | 8.64        | 6.73     | 7.99     | 7.36        | 8.00    | 884    |
|          | 6.69              | 7.99                  | 9.30     | 8.65        | 6.74     | 8.01     | 7.38        | 8.01    | 876    |
|          | 7.18              | 7.99                  | 9.31     | 8.65        | 6.77     | 8.07     | 7.42        | 8.04    | 869    |
|          | 7.77              | 7.98                  | 9.31     | 8.65        | 6.79     | 8.07     | 7.43        | 8.04    | 854    |
|          | 7.10              | 7.98                  | 9.30     | 8.64        | 6.83     | 8.11     | 7.47        | 8.06    | 838    |
|          | 6.58              | 7.97                  | 9.31     | 8.64        | 6.82     | 8.09     | 7.46        | 8.05    | 831    |
| Decrease | 5.84              | 7.97                  | 9.30     | 8.64        | 6.80     | 8.10     | 7.45        | 8.04    | 825    |
|          | 5.53              | 7.96                  | 9.31     | 8.64        | 6.83     | 8.15     | 7.49        | 8.06    | 816    |
|          | 4.76              | 7.94                  | 9.31     | 8.63        | 6.85     | 8.18     | 7.52        | 8.07    | 810    |
|          | 4.27              | 7.93                  | 9.32     | 8.63        | 6.80     | 8.17     | 7.49        | 8.06    | 800    |
|          | 3.76              | 7.91                  | 9.31     | 8.61        | 6.79     | 8.21     | 7.50        | 8.06    | 783    |
|          | 3.30              | 7.89                  | 9.31     | 8.60        | 6.82     | 8.18     | 7.50        | 8.05    | 787    |
|          | 2.46              | 7.85                  | 9.29     | 8.57        | 6.81     | 8.27     | 7.54        | 8.06    | 784    |
|          | 2.14              | 7.80                  | 9.21     | 8.51        | 6.72     | 8.14     | 7.43        | 7.97    | 777    |
|          | 1.35              | 7.47                  | 8.48     | 7.98        | 6.52     | 7.01     | 6.77        | 7.37    | 769    |

Rsa- steepest radius of the anterior corneal surface; Rfa- flattest radius of the anterior corneal surface; Rma- Mean radius of the anterior corneal surface; Rsp- steepest radius of the posterior corneal surface; Rfp- flattest radius of the posterior corneal surface; Rmp- Mean radius of the posterior corneal surface; Rm- Mean corneal radius; t- Corneal thickness

**Table S5.** Cornea 5.

|          | Pressure<br>(kPa) | Pentacam measurements |          |             |          |          |             |         | t (μm) |
|----------|-------------------|-----------------------|----------|-------------|----------|----------|-------------|---------|--------|
|          |                   | Rsa (mm)              | Rfa (mm) | Rma<br>(mm) | Rsp (mm) | Rfp (mm) | Rmp<br>(mm) | Rm (mm) |        |
| Increase | 1.51              | 7.49                  | 8.03     | 7.76        | 6.37     | 6.71     | 7.06        | 7.41    | 816    |
|          | 2.01              | 7.47                  | 8.05     | 7.76        | 6.51     | 6.89     | 7.14        | 7.45    | 807    |
|          | 2.44              | 7.49                  | 8.16     | 7.83        | 6.53     | 6.97     | 7.18        | 7.50    | 795    |
|          | 2.71              | 7.51                  | 8.21     | 7.86        | 6.60     | 7.03     | 7.23        | 7.55    | 784    |
|          | 2.99              | 7.67                  | 8.50     | 8.09        | 6.91     | 7.38     | 7.50        | 7.79    | 763    |

|          |      |      |      |      |      |      |      |      |     |
|----------|------|------|------|------|------|------|------|------|-----|
|          | 3.50 | 7.71 | 8.63 | 8.17 | 7.00 | 7.58 | 7.59 | 7.88 | 757 |
|          | 4.10 | 7.79 | 8.79 | 8.29 | 7.12 | 7.77 | 7.71 | 8.00 | 747 |
|          | 4.59 | 7.83 | 8.92 | 8.38 | 7.21 | 7.90 | 7.79 | 8.08 | 740 |
|          | 5.17 | 7.86 | 9.03 | 8.45 | 7.31 | 8.02 | 7.88 | 8.16 | 732 |
|          | 5.57 | 7.88 | 9.08 | 8.48 | 7.41 | 8.17 | 7.94 | 8.21 | 725 |
|          | 6.09 | 7.90 | 9.10 | 8.50 | 7.42 | 8.20 | 7.96 | 8.23 | 717 |
|          | 6.61 | 7.91 | 9.13 | 8.52 | 7.51 | 8.27 | 8.02 | 8.27 | 707 |
|          | 7.08 | 7.92 | 9.13 | 8.53 | 7.55 | 8.35 | 8.04 | 8.28 | 700 |
|          | 7.47 | 7.93 | 9.13 | 8.53 | 7.59 | 8.38 | 8.06 | 8.30 | 693 |
|          | 8.17 | 7.92 | 9.12 | 8.52 | 7.61 | 8.42 | 8.06 | 8.29 | 685 |
|          | 7.40 | 7.92 | 9.14 | 8.53 | 7.66 | 8.46 | 8.09 | 8.31 | 673 |
|          | 6.71 | 7.90 | 9.14 | 8.52 | 7.63 | 8.42 | 8.07 | 8.30 | 669 |
|          | 6.15 | 7.87 | 9.12 | 8.50 | 7.66 | 8.46 | 8.08 | 8.29 | 653 |
|          | 5.34 | 7.84 | 9.12 | 8.48 | 7.69 | 8.50 | 8.09 | 8.28 | 647 |
| Decrease | 4.47 | 7.80 | 9.08 | 8.44 | 7.60 | 8.42 | 8.02 | 8.23 | 640 |
|          | 3.65 | 7.69 | 8.99 | 8.34 | 7.48 | 8.33 | 7.91 | 8.12 | 636 |
|          | 2.86 | 7.49 | 8.71 | 8.10 | 7.26 | 8.02 | 7.68 | 7.89 | 631 |
|          | 2.23 | 7.28 | 8.17 | 7.73 | 6.96 | 7.56 | 7.34 | 7.53 | 629 |

Rsa- steepest radius of the anterior corneal surface; Rfa- flattest radius of the anterior corneal surface; Rma- Mean radius of the anterior corneal surface; Rsp- steepest radius of the posterior corneal surface; Rfp- flattest radius of the posterior corneal surface; Rmp- Mean radius of the posterior corneal surface; Rm- Mean corneal radius; t- Corneal thickness

**Table S6.** Cornea 6.

|          | Pentacam measurements |          |          |          |          |          |          |         |        |
|----------|-----------------------|----------|----------|----------|----------|----------|----------|---------|--------|
|          | Pressure (kPa)        | Rsa (mm) | Rfa (mm) | Rma (mm) | Rsp (mm) | Rfp (mm) | Rmp (mm) | Rm (mm) | t (μm) |
|          | 2.44                  | 7.01     | 8.97     | 7.99     | 6.52     | 6.92     | 7.25     | 7.62    | 826    |
|          | 3.72                  | 6.97     | 8.95     | 7.96     | 6.42     | 6.76     | 7.19     | 7.57    | 800    |
| Increase | 4.84                  | 6.92     | 9.03     | 7.98     | 6.55     | 7.02     | 7.26     | 7.62    | 794    |
|          | 5.86                  | 6.95     | 9.15     | 8.05     | 6.68     | 7.16     | 7.37     | 7.71    | 782    |
|          | 7.55                  | 7.02     | 9.33     | 8.18     | 6.91     | 7.51     | 7.54     | 7.86    | 774    |
|          | 7.14                  | 7.04     | 9.33     | 8.19     | 6.83     | 7.37     | 7.51     | 7.85    | 769    |
|          | 6.41                  | 7.02     | 9.27     | 8.15     | 6.79     | 7.36     | 7.47     | 7.81    | 763    |
|          | 5.49                  | 7.00     | 9.24     | 8.12     | 6.68     | 7.14     | 7.40     | 7.76    | 758    |
| Decrease | 4.65                  | 6.95     | 9.22     | 8.09     | 6.68     | 7.16     | 7.38     | 7.73    | 749    |
|          | 4.17                  | 6.96     | 9.15     | 8.06     | 6.54     | 7.00     | 7.30     | 7.68    | 741    |
|          | 3.17                  | 6.93     | 9.07     | 8.00     | 6.53     | 6.96     | 7.27     | 7.63    | 740    |
|          | 2.30                  | 6.99     | 8.96     | 7.98     | 7.13     | 7.71     | 7.55     | 7.76    | 768    |

Rsa- steepest radius of the anterior corneal surface; Rfa- flattest radius of the anterior corneal surface; Rma- Mean radius of the anterior corneal surface; Rsp- steepest radius of the posterior corneal surface; Rfp- flattest radius of the posterior corneal surface; Rmp- Mean radius of the posterior corneal surface; Rm- Mean corneal radius; t- Corneal thickness

**Table S7.** Cornea 7.

|  | Pentacam measurements |          |          |          |          |          |          |         |        |
|--|-----------------------|----------|----------|----------|----------|----------|----------|---------|--------|
|  | Pressure (kPa)        | Rsa (mm) | Rfa (mm) | Rma (mm) | Rsp (mm) | Rfp (mm) | Rmp (mm) | Rm (mm) | t (μm) |
|  | 1.92                  | 7.55     | 8.07     | 7.81     | 6.04     | 6.73     | 6.39     | 7.10    | 1073   |
|  | 2.35                  | 7.65     | 8.23     | 7.94     | 6.15     | 6.92     | 6.54     | 7.24    | 1060   |
|  | 3.11                  | 7.79     | 8.44     | 8.12     | 6.32     | 7.15     | 6.74     | 7.43    | 1051   |
|  | 3.68                  | 7.91     | 8.63     | 8.27     | 6.44     | 7.39     | 6.92     | 7.59    | 1042   |
|  | 4.30                  | 7.96     | 8.74     | 8.35     | 6.53     | 7.53     | 7.03     | 7.69    | 1036   |
|  | 4.98                  | 8.03     | 8.83     | 8.43     | 6.60     | 7.64     | 7.12     | 7.78    | 1032   |
|  | 5.69                  | 8.07     | 8.88     | 8.48     | 6.67     | 7.73     | 7.20     | 7.84    | 1027   |
|  | 6.42                  | 8.11     | 8.93     | 8.52     | 6.71     | 7.82     | 7.27     | 7.89    | 1021   |
|  | 7.67                  | 8.13     | 8.98     | 8.56     | 6.74     | 7.89     | 7.32     | 7.94    | 1016   |

|          |      |      |      |      |      |      |      |      |      |
|----------|------|------|------|------|------|------|------|------|------|
|          | 7.97 | 8.14 | 9.00 | 8.57 | 6.77 | 7.95 | 7.36 | 7.97 | 1011 |
|          | 7.19 | 8.14 | 9.03 | 8.59 | 6.77 | 8.01 | 7.39 | 7.99 | 1003 |
|          | 6.49 | 8.13 | 9.00 | 8.57 | 6.76 | 8.00 | 7.38 | 7.97 | 996  |
|          | 5.63 | 8.11 | 8.99 | 8.55 | 6.72 | 7.96 | 7.34 | 7.95 | 987  |
|          | 4.99 | 8.09 | 8.99 | 8.54 | 6.66 | 7.87 | 7.27 | 7.90 | 980  |
| Decrease | 4.11 | 8.07 | 8.94 | 8.51 | 6.65 | 7.93 | 7.29 | 7.90 | 975  |
|          | 3.59 | 8.03 | 8.89 | 8.46 | 6.64 | 7.77 | 7.21 | 7.83 | 969  |
|          | 2.94 | 7.97 | 8.79 | 8.38 | 6.52 | 7.67 | 7.10 | 7.74 | 966  |
|          | 2.42 | 7.87 | 8.62 | 8.25 | 6.49 | 7.46 | 6.98 | 7.61 | 963  |
|          | 1.59 | 7.55 | 8.10 | 7.83 | 6.02 | 6.83 | 6.43 | 7.13 | 962  |

Rsa- steepest radius of the anterior corneal surface; Rfa- flattest radius of the anterior corneal surface; Rma- Mean radius of the anterior corneal surface; Rsp- steepest radius of the posterior corneal surface; Rfp- flattest radius of the posterior corneal surface; Rmp- Mean radius of the posterior corneal surface; Rm- Mean corneal radius ;t- Corneal thickness
